# Supplementary material for: Matching and adjusting energy band structures of Pd-modified sulphides (ZnS, In2S3 and CuS) and improving the photocatalytic activity of CO2 photoreduction
Source: Royal Society of Chemistry journal article supplement (doi:10.1039/c9nr10394e), 2020-01-01
Supplement: c9nr10394e1.pdf [file c9nr10394e1.pdf]

Supplementary Information for

**Matching and adjusting energy band structures of Pd-modified sulphides (ZnS, In<sub>2</sub>S<sub>3</sub> and CuS) and improving the photocatalytic activity of CO<sub>2</sub> photoreduction**

Hanbo Li, Tongqing Sun, Lixin Zhang and Yaan Cao\*

Key Laboratory of Weak-Light Nonlinear Photonics, Ministry of Education, TEDA Applied Physics

Institute and School of Physics, Nankai University, Tianjin 300457, China.

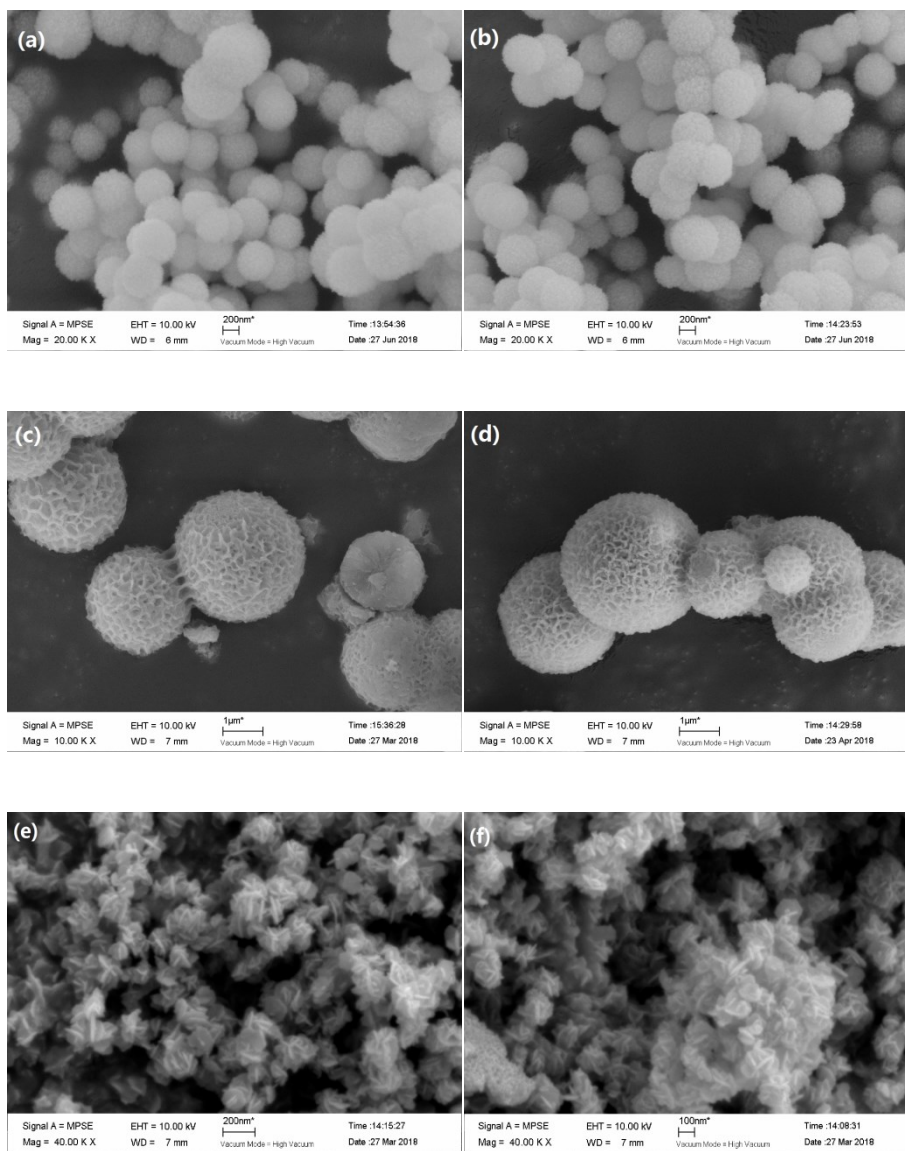

**Fig. S1.** SEM images of (a) ZnS, (b) ZnS-Pd1.5%, (c) In<sub>2</sub>S<sub>3</sub>, (d) In<sub>2</sub>S<sub>3</sub>-Pd1.5%, (e) CuS and (f) CuS-Pd1.5% samples.

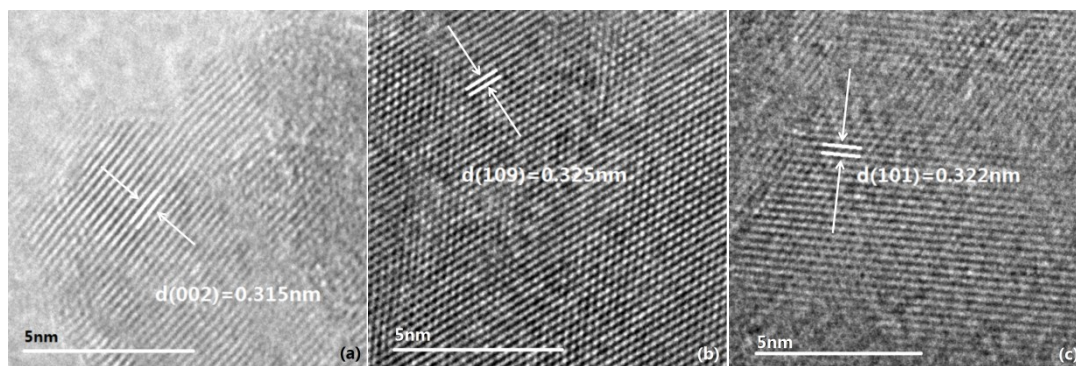

**Fig. S2.** TEM images of (a) ZnS, (b)  $\text{In}_2\text{S}_3$  and (c) CuS samples.

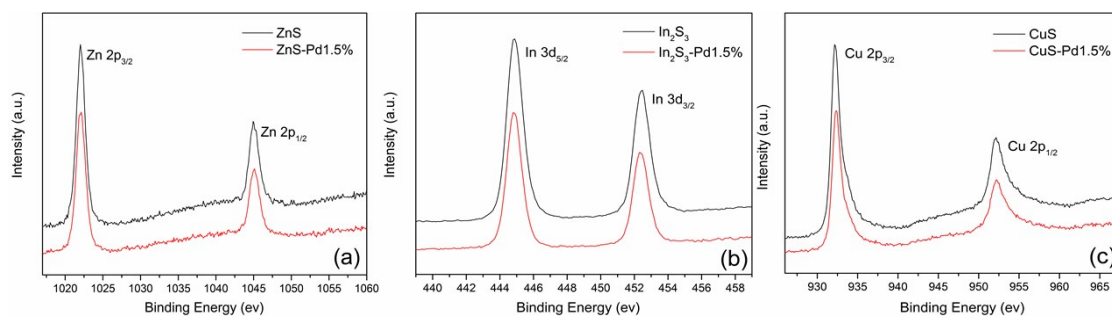

**Fig. S3.** (a) Zn2p XPS spectra of ZnS and ZnS-Pd1.5% samples. (b) In3d XPS spectra of  $\text{In}_2\text{S}_3$  and  $\text{In}_2\text{S}_3$ -Pd1.5% samples. (c) Cu2p XPS spectra of CuS and CuS-Pd1.5% samples.

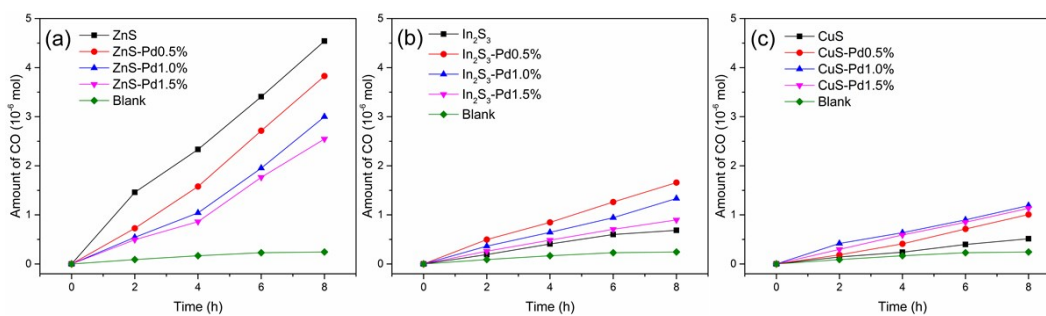

**Fig. S4.** Photocatalytic activity of (a) ZnS, ZnS-PdX%, (b)  $\text{In}_2\text{S}_3$ ,  $\text{In}_2\text{S}_3$ -PdX% and (c) CuS, CuS-PdX% on the reduction of  $\text{CO}_2$  into CO under UV light irradiation for 8 h.

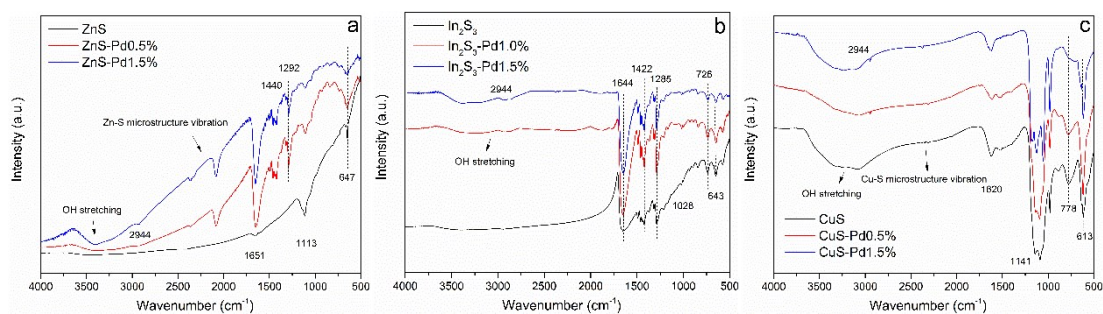

**Fig. S5.** FTIR spectra of (a) pure ZnS, ZnS–Pd0.5% and ZnS–Pd1.5% samples; (b) pure  $\text{In}_2\text{S}_3$ ,  $\text{In}_2\text{S}_3$ –Pd0.5% and  $\text{In}_2\text{S}_3$ –Pd1.5% samples; (c) pure CuS, CuS–Pd0.5% and CuS–Pd1.5% samples.

In order to better study the surface species, structure and chemical bond of samples, the FTIR spectra of the samples in the frequency range 500–4000  $\text{cm}^{-1}$  were shown in Fig. S5. It was obvious that the FTIR spectra of Pd modified sulphide samples showed peaks similar to that of the pure sulphide samples. In Figure S5(a), the characteristic ZnS vibration peaks can be noticed around the bands of 1113  $\text{cm}^{-1}$  and 647  $\text{cm}^{-1}$ . And the broad band of about 2500–3300  $\text{cm}^{-1}$  corresponded to the stretching vibration of O-H, indicating the presence of water molecules adsorbed on the surface of photocatalysts. With the increase of Pd modification, the adsorption capacity of the photocatalysts to water molecules increases gradually. The band around 1700–2500  $\text{cm}^{-1}$  may be due to the microstructure formation of the sample. For Pd modified ZnS samples, the splitting into two new bands at 2944  $\text{cm}^{-1}$  was due to the surface species of Pd. The bands around 1292  $\text{cm}^{-1}$ , 1440  $\text{cm}^{-1}$ , and 1651  $\text{cm}^{-1}$  can be attributed to C=O symmetric and asymmetric stretching modes, which were caused by the absorption of atmospheric carbon dioxide by the photocatalyst surface. In Figure S5(b), the characteristic  $\text{In}_2\text{S}_3$  vibration peaks can be noticed around the bands of 643  $\text{cm}^{-1}$ , 726  $\text{cm}^{-1}$  and 1028  $\text{cm}^{-1}$ . And the peaks from 3500 to 2600  $\text{cm}^{-1}$  are corresponding to the O-H stretch vibration of  $\text{H}_2\text{O}$ , and the peaks at 1644  $\text{cm}^{-1}$ , 1422  $\text{cm}^{-1}$  and 1285  $\text{cm}^{-1}$  are corresponding to the C=O stretch vibration of  $\text{CO}_2$  absorbed in the sample. For Pd modified  $\text{In}_2\text{S}_3$  samples, the splitting into two new bands at 2944  $\text{cm}^{-1}$  was due to the surface species of Pd. In Figure S5(c), three peaks at 613, 778 and 1141  $\text{cm}^{-1}$  were observed. The weak transmittance peaks are attributed at 613 and 778  $\text{cm}^{-1}$  due to metal sulfide stretching vibration corresponding to CuS. The other one IR peak appeared at 1141  $\text{cm}^{-1}$  is owing to stretching frequency of C=C and C=S. The broad peak at 3050 to 3650  $\text{cm}^{-1}$  is attributed to the stretching vibration of OH bond. The narrow peak observed at 1620  $\text{cm}^{-1}$  is attributed to asymmetric and symmetric stretching vibrations of O–C–O bonds. The band around 2334  $\text{cm}^{-1}$  may be due to the microstructure formation of the sample. For Pd

modified CuS samples, the new peak at 2944  $\text{cm}^{-1}$  was due to the surface species of Pd.

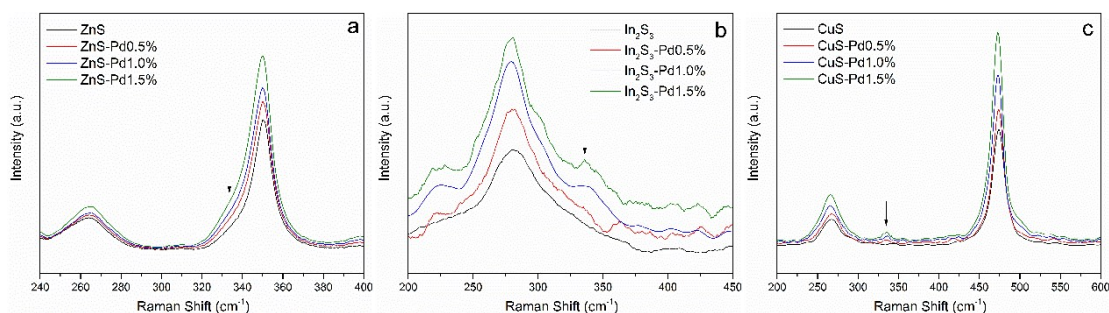

**Fig. S6.** Raman spectra of (a) pure ZnS, ZnS–Pd0.5%, ZnS–Pd1.0%, and ZnS–Pd1.5% samples; (b) pure  $\text{In}_2\text{S}_3$ ,  $\text{In}_2\text{S}_3$ –Pd0.5%,  $\text{In}_2\text{S}_3$ –Pd1.0%, and  $\text{In}_2\text{S}_3$ –Pd1.5% samples; (c) pure CuS, CuS–Pd0.5%, CuS–Pd1.0%, and CuS–Pd1.5% samples.

The existence of surface active species S-Pd-S was further confirmed by Raman spectra. Raman spectra were taken on a Horiba Scientific LabRAM HR Evolution by using the 532 nm line of 532 semiconductor laser. Raman spectra of pure sulphide and Pd modified sulphide are plotted in Figure S6, to further investigate the structure of the obtained samples. In Figure S6(a), The LO and TO phonon modes from these ZnS-Pd samples were observed at 350, and 265  $\text{cm}^{-1}$ , respectively, consistent with observations for pure ZnS. In Figure S6(b), The high-energy polarized Raman peak at 280  $\text{cm}^{-1}$  can be clearly ascribed to the  $A_{1g}$  mode, and the peaks occurring at 225  $\text{cm}^{-1}$  corresponds to  $E_g$  mode of  $\text{In}_2\text{S}_3$ . In Figure S6(c), a primary sharp and intense peak at the frequency of 473  $\text{cm}^{-1}$ , and a relatively wide peak at the frequency of 264  $\text{cm}^{-1}$  were observed. The former sharp band in the high frequency region is ascribed to the S-S stretching vibrational mode, while the latter broader band corresponds to the lattice vibrational  $A_{1g}$  TO mode.

Compared with pure sulphide, no shift of Raman peaks is detected for Pd modified sulphide samples, implying that the Pd ions are not weaved into ZnS,  $\text{In}_2\text{S}_3$  and CuS lattice and might exist on the surface as some kind of species. In addition, a new Raman peaks at about 334  $\text{cm}^{-1}$  in Pd modified sulphide samples is observed, ascribed to stretching modes of S–Pd bonds on surface.
